# Supplementary material for: Machine-learning algorithms for asthma, COPD, and lung cancer risk assessment using circulating microbial extracellular vesicle data and their application to assess dietary effects
Source: PubMed Central journal article supplement (PMC9534896; doi:10.1038/s12276-022-00846-5), 2022-09-30
Supplement: 12276_2022_846_MOESM1_ESM.pdf [file 12276_2022_846_MOESM1_ESM.pdf]

## **Supplementary Figure Legends**

### **Supplementary Fig. 1. Correlation between age, sex, and serum microbiome**

Pearson's correlation was evaluated at principal components 1 and 2 (PC1 and PC2) to determine if there was significant correlation between the **a)** age or **b)** sex of clinical subjects and their serum microbiome profiles. Significance was established at  $p \leq 0.05$ .

### **Supplementary Fig. 2. Serum microbiome compositional profiles between clinical groups (class, order, and family levels)**

Composition of the most abundant taxa of the serum EV microbiome in healthy control, COPD, and lung cancer clinical groups at the **a)** class, **b)** order, and **c)** family levels was expressed as bar plots based on the relative abundance of taxa within each sample.

# Supplementary Fig. 1

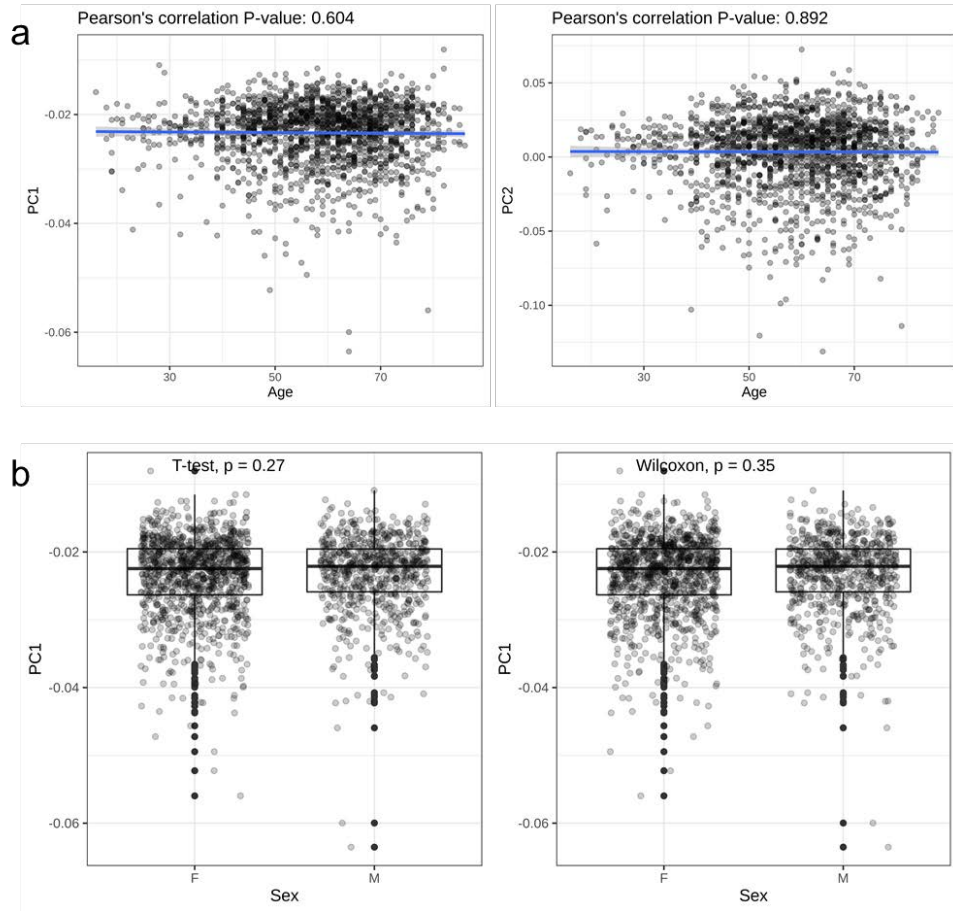

Supplementary Fig. 2

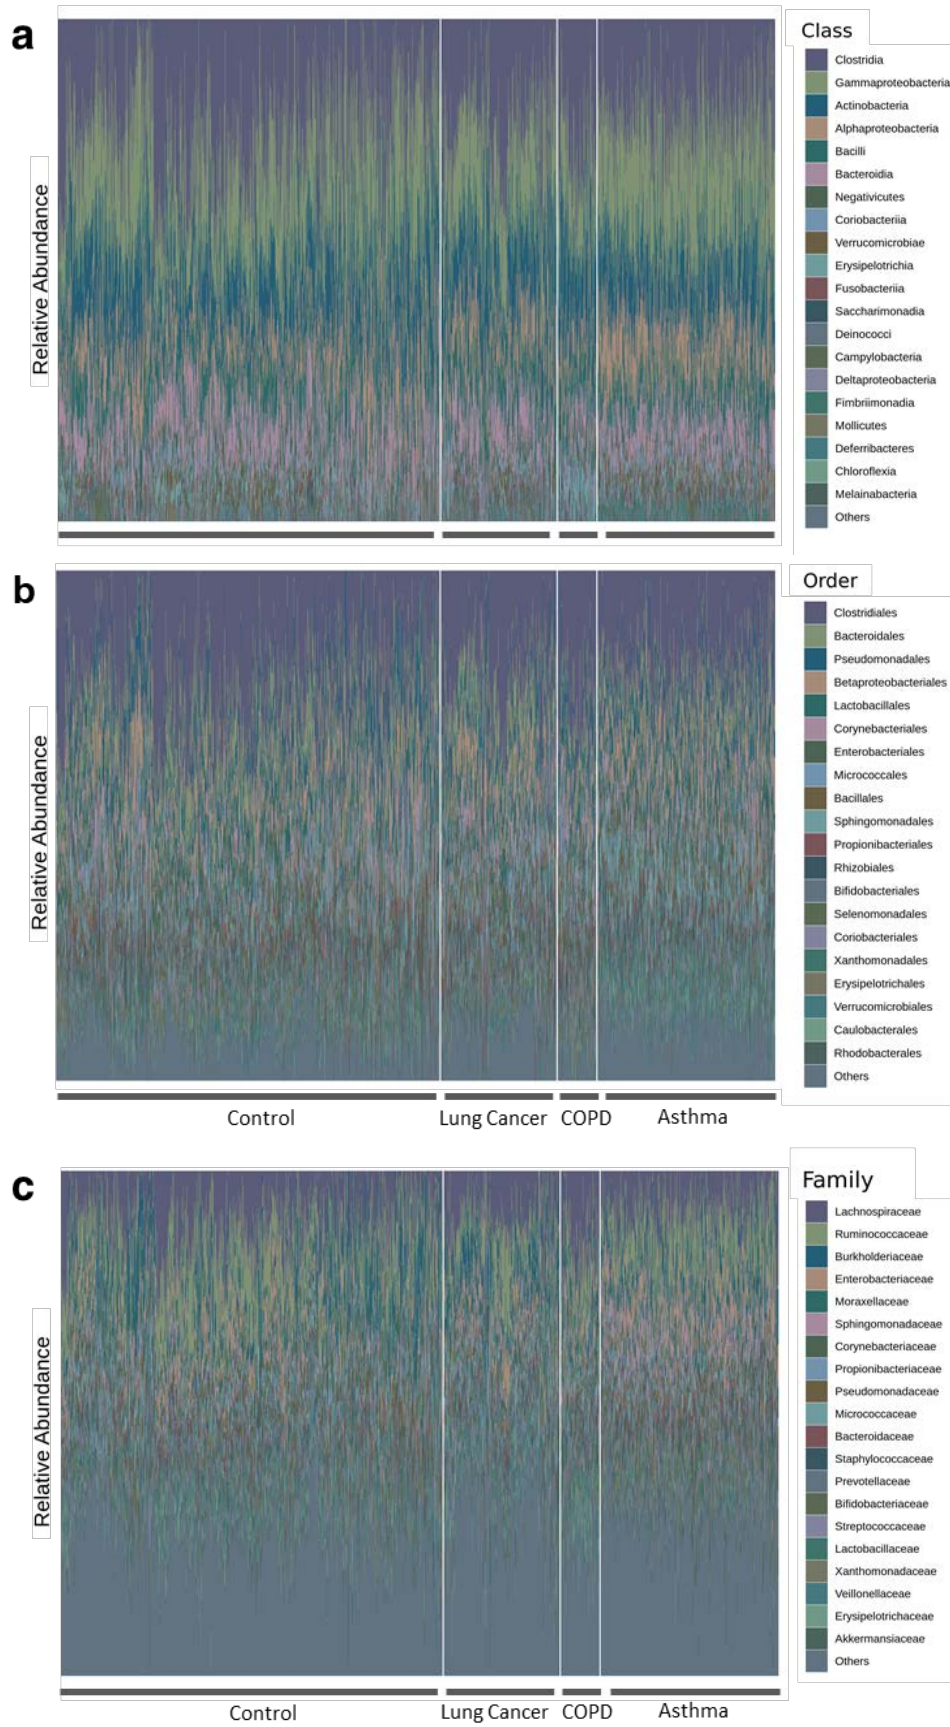

## Supplementary Tables

**Supplementary Table 1.** Basic subject clinical characteristics

| <b>Group</b> | <b>Institution</b>                | <b>No.</b> | <b>Sex (M/F)</b> | <b>Age (mean [SD])</b> |
|--------------|-----------------------------------|------------|------------------|------------------------|
| Control      | Inje University Haeundae Hospital | 928        | 0.35             | 58.78 [10.68]          |
| COPD         | Konkuk University Medical Center  | 92         | 22.00            | 69.68 [7.33]           |
| Asthma       | Asan Medical Center               | 428        | 0.69             | 51.53 [15.59]          |
| Lung cancer  | Samsung Medical Center            | 251        | 1.68             | 62.72 [10.67]          |
|              | Dankook University Hospital       | 28         |                  |                        |

COPD: Chronic Obstructive Pulmonary Disease; SD: Standard Deviation.

**Supplementary Table 2.** Summary of raw serum microbial EV sample read counts and profiled OTU counts

| <b>Group</b> | <b>Read Count</b> |               |           | <b>OTU</b>  |               |           |
|--------------|-------------------|---------------|-----------|-------------|---------------|-----------|
|              | <b>Mean</b>       | <b>Median</b> | <b>SD</b> | <b>Mean</b> | <b>Median</b> | <b>SD</b> |
| Control      | 57,252            | 42,485        | 40,749    | 9,589       | 8,457         | 6,929     |
| COPD         | 29,441            | 25,908        | 13,283    | 13,039      | 12,012        | 5,354     |
| Asthma       | 71,328            | 64,823        | 33,806    | 9,736       | 7,704         | 7,750     |
| Lung cancer  | 35,409            | 28,359        | 20,597    | 13,345      | 11,022        | 8,249     |
| Total        | 55,993            | 44,444        | 37,745    | 10,384      | 9,145         | 7,433     |

OTU: Operational Taxonomic Unit; COPD: Chronic Obstructive Pulmonary Disease; SD: Standard Deviation.

**Supplementary Table 3.** Assessment of important serum microbial EV features in respiratory disease models

| <b>Model</b> | <b>Phylum</b>       | <b>Weight</b> | <b>No. of Features</b> | <b>Feature Weight Range</b> |
|--------------|---------------------|---------------|------------------------|-----------------------------|
| COPD         | Firmicutes          | 0.092         | 326                    | -2.15E-04 ~ 1.82E-02        |
|              | Actinobacteria      | 0.037         | 250                    | -1.64E-04 ~ 2.72E-03        |
|              | Verrucomicrobia     | 0.015         | 17                     | 5.82E-04 ~ 2.16E-03         |
|              | Proteobacteria      | 0.015         | 469                    | -2.05E-04 ~ 4.07E-03        |
|              | Bacteroidetes       | 0.006         | 125                    | -1.44E-04 ~ 1.09E-03        |
|              | Epsilonbacteraeota  | 0.002         | 6                      | 1.05E-05 ~ 1.61E-03         |
|              | Acidobacteria       | 0.001         | 28                     | -3.06E-05 ~ 4.66E-04        |
| Asthma       | Proteobacteria      | 0.123         | 469                    | -1.62E-04 ~ 9.60E-03        |
|              | Armatimonadetes     | 0.034         | 3                      | 9.64E-04 ~ 2.09E-02         |
|              | Bacteroidetes       | 0.022         | 125                    | -4.78E-05 ~ 3.33E-03        |
|              | Actinobacteria      | 0.016         | 250                    | -1.25E-04 ~ 3.31E-03        |
|              | Firmicutes          | 0.012         | 326                    | -1.49E-04 ~ 2.22E-03        |
|              | Verrucomicrobia     | 0.009         | 17                     | 6.73E-05 ~ 1.71E-03         |
|              | Cyanobacteria       | 0.002         | 31                     | -3.84E-06 ~ 5.71E-04        |
| Lung cancer  | Proteobacteria      | 0.090         | 469                    | -1.28E-04 ~ 1.59E-02        |
|              | Firmicutes          | 0.062         | 326                    | -1.01E-04 ~ 5.58E-03        |
|              | Epsilonbacteraeota  | 0.031         | 6                      | 7.70E-04 ~ 1.13E-02         |
|              | Actinobacteria      | 0.020         | 250                    | -1.61E-04 ~ 1.91E-03        |
|              | Bacteroidetes       | 0.009         | 125                    | -7.15E-05 ~ 3.19E-03        |
|              | Deinococcus-Thermus | 0.008         | 4                      | 1.70E-04 ~ 4.87E-03         |
|              | Verrucomicrobia     | 0.006         | 17                     | 9.70E-06 ~ 1.90E-03         |
|              | Tenericutes         | 0.003         | 12                     | -3.36E-05 ~ 1.99E-03        |
| Fusobacteria | 0.002               | 7             | 1.12E-04 ~ 5.19E-04    |                             |
